# Supplementary material for: Mutation Study of Malaysian Patients with Ornithine Transcarbamylase Deficiency: Clinical, Molecular, and Bioinformatics Analyses of Two Novel Missense Mutations of the OTC Gene
Source: Biomed Res Int. 2018 Aug 5;2018:4320831. doi: 10.1155/2018/4320831 (PMC6098936; doi:10.1155/2018/4320831)
Supplement: Supplementary Materials — Table S1: in silico prediction of novel and known mutations located at ligand-binding pocket in the OTCase structure. Table S2: Z-score, binding affinities, RMSDs, and hydrogen bond interactions of native and mutant models. [file 4320831.f1.docx]

**Supplementary data for the manuscript:**

**Mutation Study of Malaysian Patients with Ornithine Transcarbamylase Deficiency: Clinical, Molecular and Bioinformatics Analyses of Two Novel Missense Mutations of the *OTC* Gene using *In Silico* Servers and Molecular Docking Method**

**Ernie Zuraida Ali1,2,*, Yuslina Zakaria1, Mohd Amran Mohd Radzi3*,* Ngu Lock Hock4 and Siti Azma Jusoh1,***

1Molecular Diagnostics and Protein Unit, Specialized Diagnostics Centre, Institute for Medical Research (IMR), Jalan Pahang, 50588 Kuala Lumpur, Malaysia.

2Faculty of Pharmacy, Universiti Teknologi MARA (UiTM), Puncak Alam Campus, 42300 Bandar Puncak Alam, Selangor, Malaysia.

3Department of Electrical and Electronic Engineering, Universiti Putra Malaysia, 43400 UPM Serdang, Selangor, Malaysia.

4Genetics Department, Kuala Lumpur Hospital, Jalan Pahang, 50586 Kuala Lumpur, Malaysia.

Correspondence should be addressed to Ernie Zuraida Ali; [erniez1980@gmail.com.my](mailto:erniez1980@gmail.com.my) and Siti Azma Jusoh; [sitiazma@puncakalam.uitm.edu.my](mailto:sitiazma@puncakalam.uitm.edu.my)

TABLE S1***:*** *In silico* prediction of novel and known mutations located at ligand binding pocket in the OTCase structure.

| **No** | **Dataset SNP from** | **Mutation** | **PolyPhen 2.0** | | **SiFT** | | **PhD-SNP** | **SNP&GO** | **MutPred** | | | | **No of server** |
| --- | --- | --- | --- | --- | --- | --- | --- | --- | --- | --- | --- | --- | --- |
| **PSIC** | **Prediction** | **Score** | **Prediction** | **G score** | **P score** | **Molecular Variation** | **Prediction reliability** |
| 1 | 1000 & HGMD | R92G | 0.848 | Possibly Damaging | 0 | Damaging | Disease | Disease | 0.992 | 0.0393 | Gain of ubiquitination at K88, Loss of catalytic residue at R92 | Confident Hypotheses | 5 |
| 2 | 1000 & HGMD | R92Q | 0.996 | Probably Damaging | 0 | Damaging | Disease | Disease | 0.994 | 0.0337 | Gain of ubiquitination at K88 | Confident Hypotheses | 5 |
| 3 | 1000 & HGMD | R92L | 0.998 | Probably Damaging | 0 | Damaging | Disease | Disease | 0.991 | 0.0289 | Gain of ubiquitination at K88, Loss of disorder, Loss of catalytic residue at R92 | Confident Hypotheses | 5 |
| 4 | 1000 & HGMD | R92P | 0.999 | Probably Damaging | 0 | Damaging | Disease | Disease | 0.982 | 0.0077 | Loss of catalytic residue at R92 | Very Confident Hypotheses | 5 |
| 5 | 1000 & HGMD | R141G | 1 | Probably Damaging | 0 | Damaging | Disease | Disease | 0.985 | 0.0272 | Gain of catalytic residue at V142, Loss of stability, Gain of sheet | Confident Hypotheses | 5 |
| 6 | 1000 | R141L | 1 | Probably Damaging | 0 | Damaging | Disease | Disease | 0.947 | 0.0344 | Gain of sheet | Confident Hypotheses | 5 |
| 7 | 1000 | L163P | 1 | Probably Damaging | 0 | Damaging | Disease | Disease | 0.944 | 0.0327 | Loss of stability, Gain of disorder | Confident Hypotheses | 5 |
| 8 | 1000 & HGMD | H168P | 1 | Probably Damaging | 0 | Damaging | Disease | Disease | 0.983 | 0.0116 | Gain of catalytic residue at H168 | Confident Hypotheses | 5 |
| 9 | HGMD | Q171E | 0.999 | Probably Damaging | 0 | Damaging | Disease | Disease | 0.838 | 0.0166 | Loss of catalytic residue at Q171 | Confident Hypotheses | 5 |
| 10 | Novel Mutation | Q171H | 1 | Probably Damaging | 0 | Damaging | Disease | Disease | 0.852 | 0.0246 | Loss of catalytic residue at Q171 | Confident Hypotheses | 5 |
| 11 | 1000 | D263Y | 1 | Probably Damaging | 0 | Damaging | Disease | Disease | 0.907 | 0.0221 | Gain of sheet | Confident Hypotheses | 5 |
| 12 | 1000 & HGMD | D263G | 1 | Probably Damaging | 0 | Damaging | Disease | Disease | 0.986 | 0.0086 | Loss of catalytic residue at D263 | Very Confident Hypotheses | 5 |
| 13 | 1000 & HGMD | S267R | 0.999 | Probably Damaging | 0 | Damaging | Disease | Disease | 0.968 | 0.0312 | Gain of MoRF binding | Confident Hypotheses | 5 |
| 14 | 1000 & HGMD | M268T | 0.994 | Probably Damaging | 0 | Damaging | Disease | Disease | 0.942 | 0.0055 | Loss of catalytic residue at M268 | Very Confident Hypotheses | 5 |
| 15 | 1000 & HGMD | C303R | 0.994 | Probably Damaging | 0 | Damaging | Disease | Disease | 0.984 | 0.0065 | Gain of MoRF binding | Very Confident Hypotheses | 5 |
| 16 | 1000 & HGMD | C303G | 0.996 | Probably Damaging | 0 | Damaging | Disease | Disease | 0.994 | 0.0249 | Gain of disorder | Confident Hypotheses | 5 |
| 17 | 1000 & HGMD | L304F | 0.96 | Probably Damaging | 0 | Damaging | Disease | Disease | 0.971 | 0.0151 | Loss of catalytic residue at L304 | Confident Hypotheses | 5 |
| 18 | 1000 & HGMD | S90G | 0.999 | Probably Damaging | 0 | Damaging | Disease | Neutral | 0.98 | 0.0051 | Loss of catalytic residue at S90 | Very Confident Hypotheses | 4 |
| 19 | 1000 & HGMD | S90N | 0.998 | Probably Damaging | 0 | Damaging | Disease | Neutral | 0.987 | 0.0326 | Loss of phosphorylation at S90, Loss of catalytic residue at S90 | Confident Hypotheses | 4 |
| 20 | 1000 & HGMD | S90R | 1 | Probably Damaging | 0 | Damaging | Disease | Neutral | 0.976 | 0.0251 | Loss of catalytic residue at S90, Loss of phosphorylation at S90 | Confident Hypotheses | 4 |
| 21 | 1000 | T91I | 0.321 | Benign | 0.01 | Damaging | Disease | Disease | 0.811 | 0.0189 | Loss of phosphorylation at T91, Loss of disorder | Confident Hypotheses | 4 |
| 22 | 1000 & HGMD | T93A | 0.912 | Probably Damaging | 0 | Damaging | Disease | Disease | 0.97 | 0.062 | Loss of phosphorylation at T93 | No reliable reference | 4 |
| 23 | 1000 & HGMD | R141Q | 1 | Probably Damaging | 0 | Damaging | Disease | Disease | 0.995 | 0.1208 | Gain of sheet | No reliable reference | 4 |
| 24 | 1000 & HGMD | R141P | 1 | Probably Damaging | 0 | Damaging | Disease | Disease | 0.992 | 0.0735 | Loss of stability | No reliable reference | 4 |
| 25 | 1000 & HGMD | H168R | 1 | Probably Damaging | 0 | Damaging | Disease | Disease | 0.995 | 0.2251 | Loss of catalytic residue at Q171 | No reliable reference | 4 |
| 26 | 1000 & HGMD | H168Q | 1 | Probably Damaging | 0 | Damaging | Disease | Disease | 0.998 | 0.3585 | Loss of catalytic residue at Y167 | No reliable reference | 4 |
| 27 | 1000 & HGMD | N199D | 1 | Probably Damaging | 0 | Damaging | Disease | Disease | 0.989 | 0.1208 | Gain of sheet | No reliable reference | 4 |
| 28 | 1000 & HGMD | N199S | 0.999 | Probably Damaging | 0 | Damaging | Disease | Disease | 0.988 | 0.2237 | Loss of loop | No reliable reference | 4 |
| 29 | Novel Mutation | N199H | 1 | Probably Damaging | 0 | Damaging | Disease | Disease | 0.945 | - | - | No reliable reference | 4 |
| 30 | 1000 & HGMD | D263N | 1 | Probably Damaging | 0 | Damaging | Disease | Disease | 0.989 | 0.1299 | Loss of helix | No reliable reference | 4 |
| 31 | 1000 & HGMD | C303Y | 0.995 | Probably Damaging | 0 | Damaging | Disease | Disease | 0.978 | 0.0519 | Gain of phosphorylation at C303 | No reliable reference | 4 |
| 32 | 1000 & HGMD | R330G | 0.996 | Probably Damaging | 0 | Damaging | Disease | Disease | 0.983 | 0.051 | Loss of stability | No reliable reference | 4 |

TABLE S2**:** Z-score, binding affinities, RMSDs and hydrogen bond interactions of native and mutant models.

| **Residue** | **ProSA-Web** | **Binding affinity (kcal/mol)** | **RMSD between PALO in native and PALO in mutant structures** | **Residue interact with**  **PALO at ligand binding pocket** | **Native residue interact with neighboring residue**  **Native residue (Atom): Neighboring residue (Atom)** | **Mutant residue interact with neighboring residue**  **Mutant residue (Atom): Neighboring residue (Atom)** |
| --- | --- | --- | --- | --- | --- | --- |
| **Z-score** |
| Native | -8.87 | -8.4 | 0.110 | S90, T91, R92, T93, R141, H168, N199, D263, S267, M268, L304, R330 | -NA- | -NA- |
| *Q171H | -8.90 | -8.4 | 0.110 | S90, T91, R92, T93, R141, H168, N199, D263, S267, M268, L304, R330 | Q171(N):H168(O)  Q171(NE2):D175(OD1)  Q171(NE2):E326(OE1)  Q171(O):A174(N)  Q171(O):D175(N)  Q171(OE1):R330(NH1) | H171(N):H168(O)  H171(O):A174(N)  H171(O):D175(N) |
| Q171E | -8.88 | -8.4 | 0.120 | S90, T91, R92, T93, R141, H168, N199, D263, S267, M268, L304, R330 | E171(N):H168(O)  E171(O):A174(N)  E171(O):D175(N)  E171(OE2):D175(OD2)  E171(OE1):R330(NH1) |
| *N199H | -8.86 | -7.8 | 1.737 | S90, T91, R92, T93, R141, H168, D263, S267, M268, L304, R330  Loss of interaction with: H199 | N199(ND2):S164(O)  N199(OD1):I200(N)  N199(O):S203(N)  N199(O):S203(OG) | H199(O):S203(N)  H199(O):S203(OG) |
| N199D | -8.86 | -8.1 | 0.205 | S90, T91, R92, T93, R141, H168, D199, D263, S267, M268, L304, R330 | D199(O):S203(N)  D199(O):S203(OG) |
| N199S | -8.90 | -8.3 | 0.553 | S90, T91, R92, T93, R141, H168, S199, D263, S267, M268, L304, R330  Form new interaction with: N198 | S199(O):S203(N)  S199(O):S203(OG) |
| R92P | -9.02 | -6.5 | 0.342 | S90, T91, R141, H168, N199, D263, S267, M268, L304, R330  Loss of interaction with: P92 and T93 | R92(O):S96(N)  R92(O):S96(OG) | P92(O):S96(N)  P92(O):S96(OG) |
| R92G | -8.93 | -7.9 | 0.119 | S90, T91, G92, T93, R141, H168, N199, D263, S267, M268, L304, R330 | G92(O):S96(N)  G92(O):S96(OG) |
| R92L | -8.84 | -8.1 | 0.237 | S90, T91, L92, T93, R141, H168, D263, S267, M268, L304, R330  Loss of interaction with: N199 | L92(O):S96(N)  L92(O):S96(OG) |
| R92Q | -8.86 | -8.1 | 0.152 | S90, T91, Q92, T93, R141, H168, N199, D263, S267, M268, L304, R330 | Q92(O):S96(N)  Q92(O):S96(OG) |
| H168R | -8.82 | -6.9 | 2.027 | S90, T91, R92, R141, D263, S267, M268, L304, R330  Loss of interaction with: R168, T93  N199, S267  Form new interaction with: P305 and K307 | H168(N):S203(OG)  H168(O):Q171(N) | R168(N):S203(OG)  R168(O):Q171(N) |
| H168Q | -8.87 | -7.6 | 0.511 | S90, T91, R92, T93, R141, Q168, N199, D263, S267, M268, L304, R330 | Q168(N):S203(OG)  Q168(O):Q171(N) |
| H168P | -8.92 | -8.1 | 0.171 | S90, T91, R92, T93, R141, N199, D263, S267, M268, L304, R330  Loss of interaction with: P168 | P168(N):S203(OG)  P168(O):Q171(N) |
| S90G | -8.88 | -8.3 | 0.148 | T91, R92, T93, R141, H168, N199, D263, S267, M268, L304, R330  Loss of interaction with: G90 | S90(OG):R94(N) | -NA- |
| S90N | -8.87 | -8.3 | 0.143 | T91, R92, T93, R141, H168, N199, D263, S267, M268, L304, R330  Loss of interaction with: N90 | -NA- |
| S90R | -8.80 | -8.3 | 0.171 | T91, R92, T93, R141, H168, N199, D263, S267, M268, L304, R330  Loss of interaction with: R90 | -NA- |
| T91I | -8.76 | -8.4 | 0.165 | S90, I91, R92, T93, R141, H168, N199, D263, S267, M268, L304 | L95(N):T91(O) | L95(N):I91(O) |
| T93A | -8.80 | -7.5 | 0.122 | S90, T91, Q92, A93, R141, H168, N199, D263, S267, M268, L304, R330 | T93(O):S96(OG)  T93(O):T97(N)  T93(O):T97(OG1)  T93(OG1):R141(NH2)  T93(OG1):R330(NH2) | A93(O):S96(OG)  A93(O):T97(N)  A93(O):T97(OG1) |
| L163P | -8.86 | -8.1 | 0.740 | S90, T91, R92, T93, R141, H168, N199, D263, S267, M268, R330  Loss of interaction with: L304 | L163(O):V142(N)  L163(N):N161(OD1) | P163(O):V142(N) |
| L304F | -8.92 | -8.4 | 0.130 | S90, T91, R92, T93, R141, H168, N199, D263, S267, M268, F304, R330 | L304(N):H302(ND1) | F304(N):H302(ND1) |
| R330G | -8.90 | -8.0 | 0.163 | S90, T91, R92, T93, R141, H168, N199, D263, S267, M268, L304  Loss of interaction with: G330 | R330(N):A327(O)  R330(NH1):Q171(OE1)  R330(NH2): T93(OG1)  R330(O):T333(OG1)  R330(O):I334(N) | G330(N):A327(O)  G330(O):T333(OG1)  G330(O):I334(N) |
| R141G | -9.05 | -7.6 | 0.110 | S90, T91, R92, T93, H168, N199, D263, S267, M268, L304, R330  Loss of interaction with: G141 | R141(O):E87(N)  R141(N):I85(O)  R141(NE):G162(O)  R141(NH1):R89(O)  R141(NH2):T93(OG1)  R141(NH2):G162(O) | G141(O):E87(N)  G141(N):I85(O) |
| R141L | -8.90 | -7.6 | 0.176 | S90, T91, R92, T93, H168, N199, D263, S267, M268, L304, R330  Loss of interaction with: L141 | L141(O):E87(N)  L141(N):I85(O) |
| R141P | -9.10 | -7.6 | 0.140 | S90, T91, R92, T93, H168, N199, D263, S267, M268, L304, R330  Loss of interaction with: P141 | P141(O):E87(N) |
| R141Q | -8.83 | -7.7 | 0.117 | S90, T91, R92, T93, H168, N199, D263, S267, M268, L304, R330  Loss of interaction with: Q141 | Q141(O):E87(N)  Q141(N):I85(O)  Q141(NE2):R89(O) |
| D263N | -8.89 | -7.9 | 1.738 | S90, T91, R92, T93, R141, H168, N263, M268, L304, R330  Loss of interaction with: N199  Form new interaction with: S267 | D263(OD2):N198(ND2)  D263(O):T262(OG1)  D263(N):T262(OG1)  D263(OD1):T264(N) | N263(O):T262(OG1) N263(N):T262(OG1)  N263(OD1):T264(N)  N263(OD1):C303(SG) |
| D263G | -8.93 | -8.0 | 0.131 | S90, T91, R92, T93, R141, H168, N199, S267, M268, L304, R330  Loss of interaction with: G263 | G263(O):T262(OG1)  G263(N):T262(OG1)  G263(N):G263(O) |
| D263Y | -8.94 | -8.2 | 0.141 | S90, T91, R92, T93, R141, H168, N199, S267, M268, L304, R330  Loss of interaction with: Y263 | Y263(OH ):N198(N)  Y263(OH):N198(ND2)  Y263(O):T262(OG1)  Y263(N):T262(OG1)  Y263(OH):D196(O) |
| S267R | -8.88 | -8.2 | 0.731 | S90, T91, R92, T93, R141, H168, N199, D263, M268, L304, R330  Loss of interaction with: R267 | R267(O):R270(N) | R267(O):R270(N) |
| M268T | -8.96 | -8.4 | 0.168 | S90, T91, R92, T93, R141, H168, N199, D263, S267, T268, L304, R330 | -NA- | -NA- |
| C303R | -8.79 | -8.0 | 1.380 | S90, T91, R92, T93, R141, N199, D263, S267, M268, L304  Loss of interaction with: H168 and R330  Form new interaction with:D263 | -NA- | R303(NH1):H168(ND1)  R303(NH2):H168(ND1) |
| C303Y | -8.92 | -8.0 | 1.255 | S90, T91, R92, T93, R141, H168, D263, M268, L304, R330  Loss of interaction with: N199  Form new interaction with: S267 | Y303(OH):D175(OD2) |
| C303G | -8.90 | -8.3 | 0.288 | S90, T91, R92, T93, R141, H168, N199, D263, S267, M268, L304, R330 | -NA- |

*Novel mutation reported in this study.
